# Supplementary material for: Identification of coffee bean varieties using hyperspectral imaging: influence of preprocessing methods and pixel-wise spectra analysis
Source: PubMed Central journal article supplement (PMC5794930; doi:10.1038/s41598-018-20270-y), 2018-02-01
Supplement: 41598_2018_20270_MOESM1_ESM.pdf [file 41598_2018_20270_MOESM1_ESM.pdf]

# **Identification of coffee bean varieties using hyperspectral imaging: influence of preprocessing methods and pixel-wise spectra analysis**

Chu Zhang, Fei Liu\*, Yong He\*

College of Biosystems Engineering and Food Science, Zhejiang University, Hangzhou, 310038, China

\*Corresponding author: Fei Liu and Yong He, E-mail: [fliu@zju.edu.cn](mailto:fliu@zju.edu.cn), [yhe@zju.edu.cn](mailto:yhe@zju.edu.cn), Tel./Fax.:+86-571-88982143

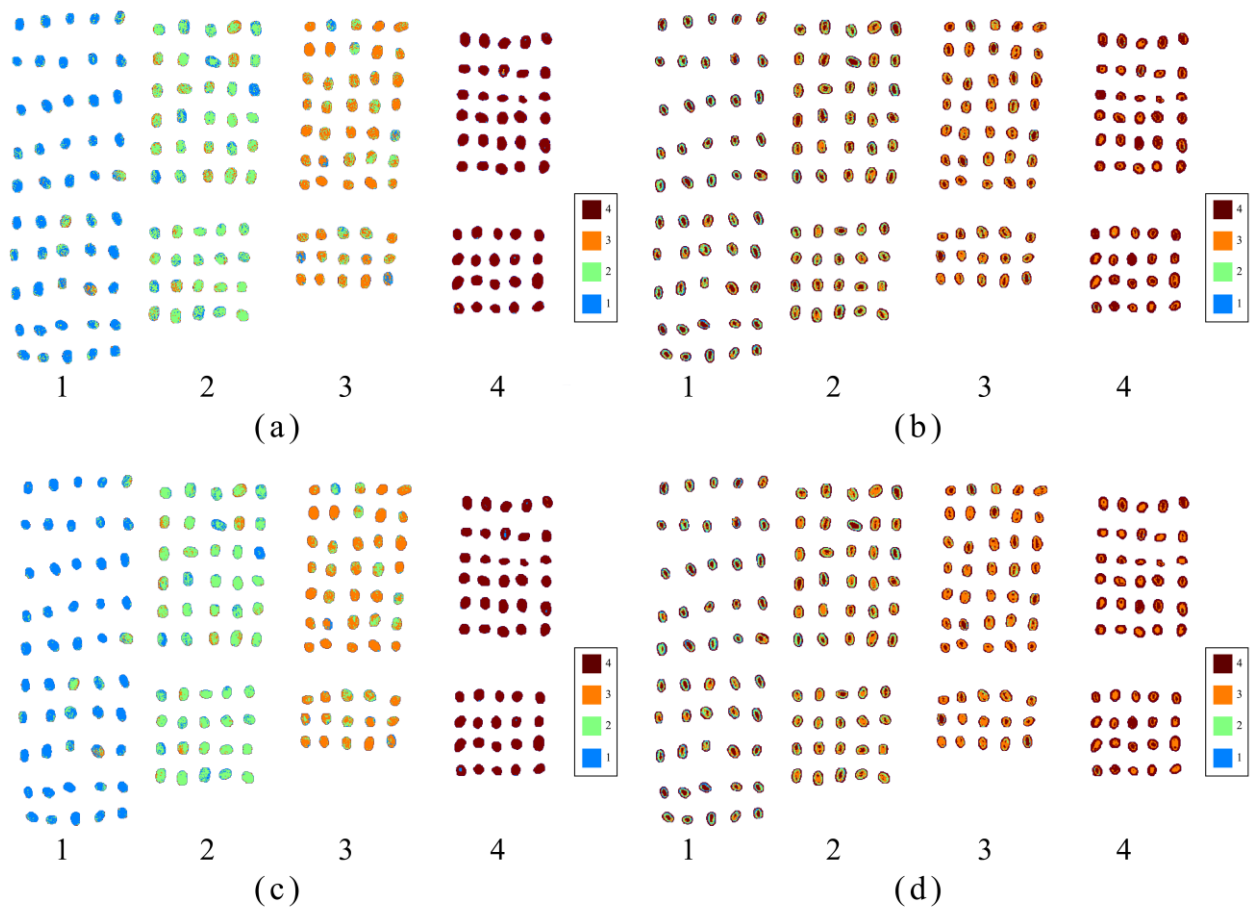

Fig. S1 Prediction maps of coffee beans: (a) prediction map of 4 varieties of coffee beans by applying SVM model built using optimal wavelengths selected from pixel-wise spectra (preprocessed by WT) to hyperspectral images; (b) prediction map of 4 varieties of coffee beans by applying SVM model built using optimal wavelengths selected from sample average spectra averaged by pixel-wise spectra (preprocessed by WT) to hyperspectral images; (c) prediction map of 4 varieties of coffee beans by applying SVM model built using optimal wavelengths selected from pixel-wise spectra (preprocessed by EMD) to hyperspectral images; (d) prediction map of 4 varieties of coffee beans by applying SVM model built using optimal wavelengths selected from sample average spectra averaged by pixel-wise spectra (preprocessed by EMD) to hyperspectral images.
